# Supplementary material
Source: publisher site journal article supplement (https://www.dovepress.com/get_supplementary_file.php?f=343540.docx)
Supplement: Supplementary file 1 [file get_supplementary_file.php]

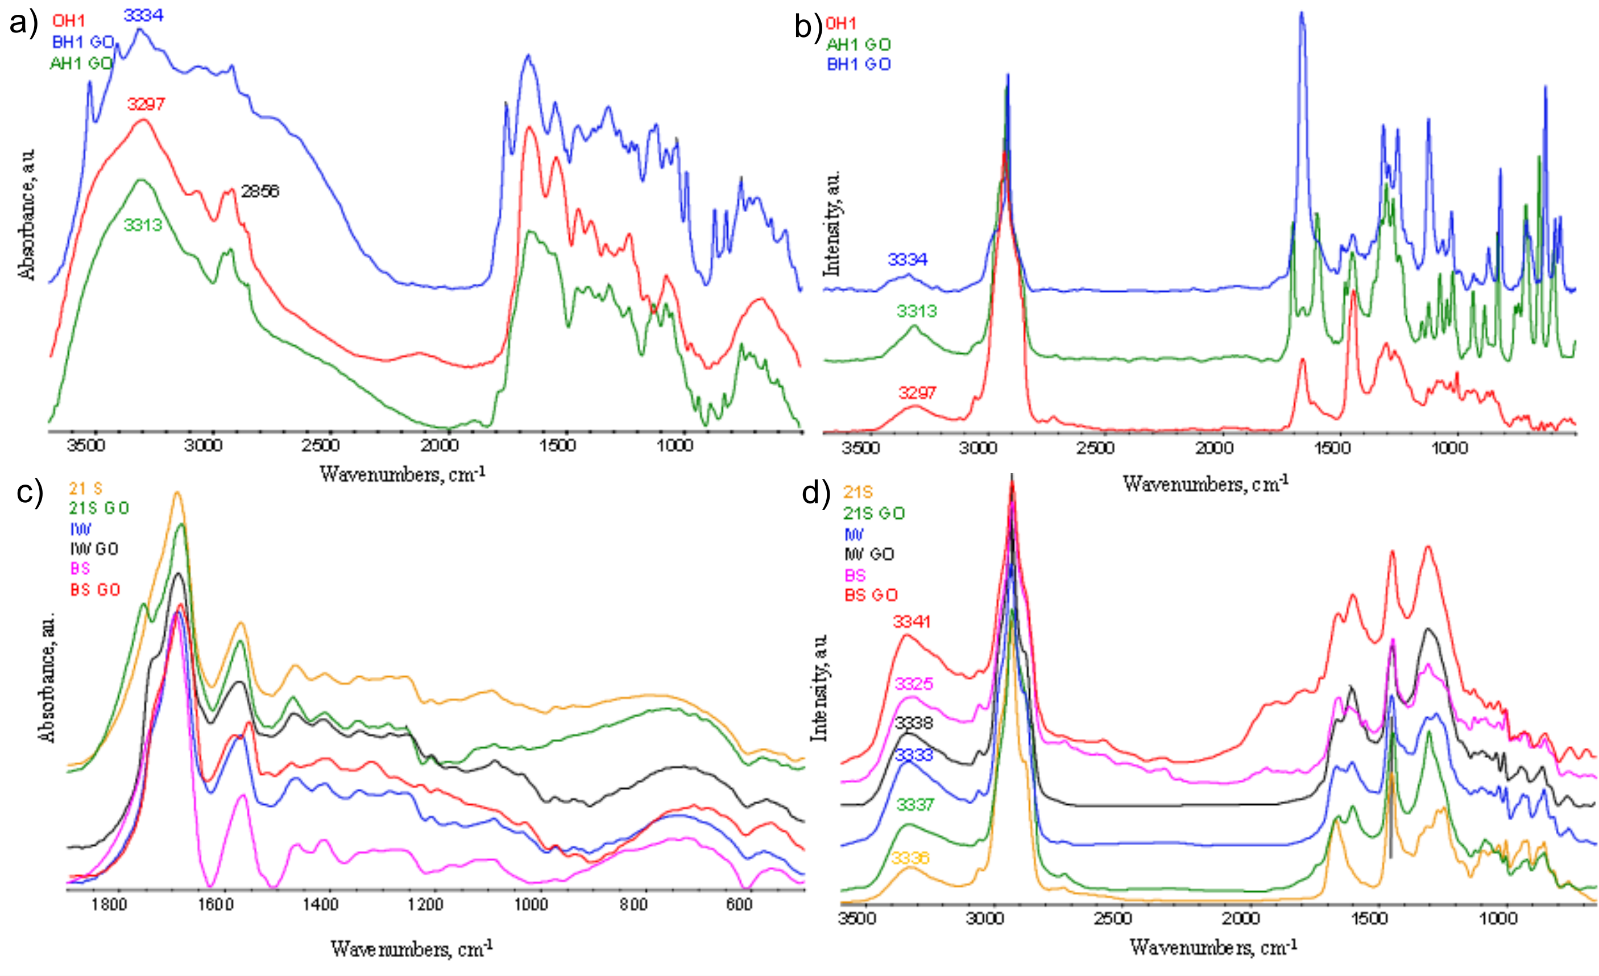


**Figure S1** FTIR and FTR spectras: a-d) amniotic samples (BS, IW, OH1, BS GO, IW GO and AH1 SA GO, BH1 AA GO and c,d) fragments of skin (21S i 21S GO).


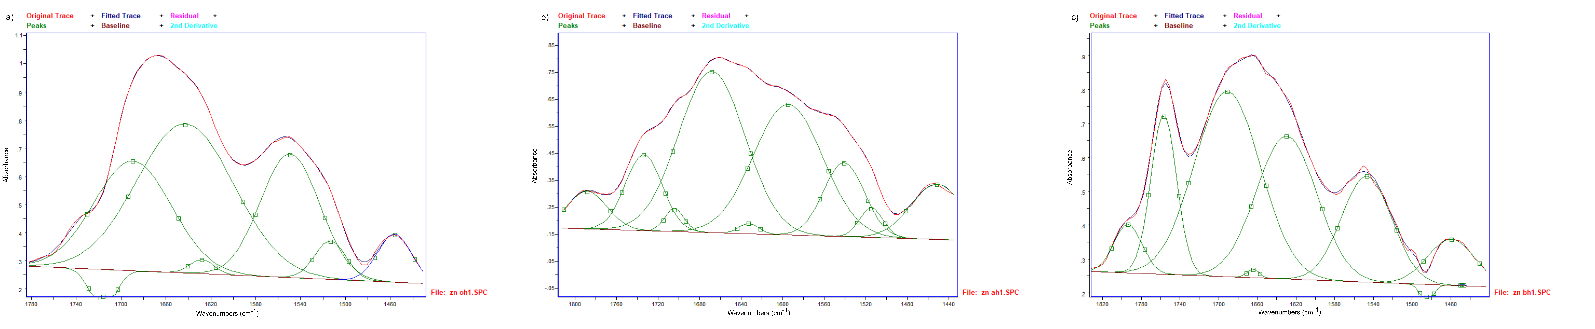


**Figure S2**. Fragment of FTIR spectra resolved into Gaussian-shaped bands at around 1750–1200 cm−1 attributed to lipid-amide I–III bands of the hypotrophy amniotic samples (a) OH1 and samples in presence of AA or SA (b) AH1 SA, c) BH1 AA).


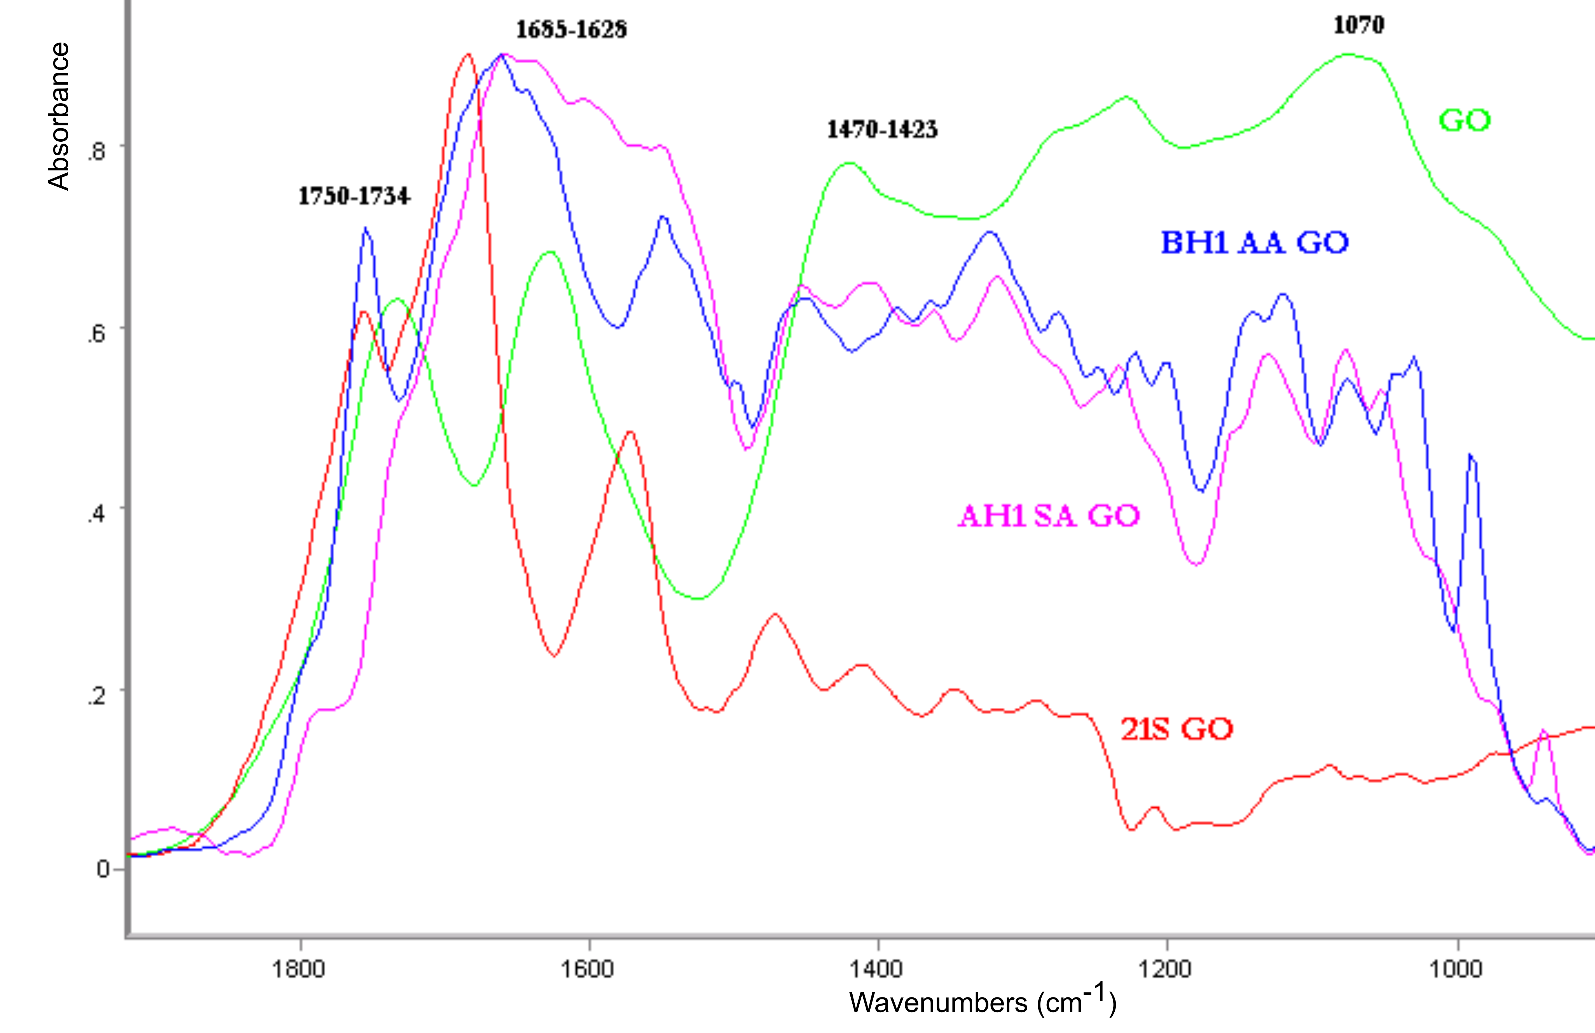


**Figure S3.** FTIR spectra: GO sample, fragments of skin 21S GO, amniotic samples (AH1 SA GO, BH1 AA GO).
